# Supplementary material
Source: publisher figshare collection journal article supplement (https://acs.figshare.com/ndownloader/files/5513873)
Supplement: Supplementary file 1 [file 5513873]

# **Supplementary Data:**

## **Table of Contents**

### **“Fragmentation of Injectable Bioadhesive Hydrogels Affords Chemotherapeutic Macromolecules”**

Yuji Yamada and Joel P. Schneider

| <u>Content</u>                                                     | <u>Page No.</u> |
|--------------------------------------------------------------------|-----------------|
| Figure S1: Efficiency of DOX loading to PDA                        | 2               |
| Figure S2: Frequency sweep and strain sweep of a DOX-PDA-BSA gel   | 3               |
| Figure S3: HPLC chromatograms of BSA, DOX, and DOX-PDA             | 4               |
| Figure S4: Degradation products of a DOX-PDA-BSA gel after 4 weeks | 5               |
| Figure S5: Cytotoxicity of gels against human dermal fibroblasts   | 6               |
| Figure S6: Time-course cell viability assay                        | 7               |

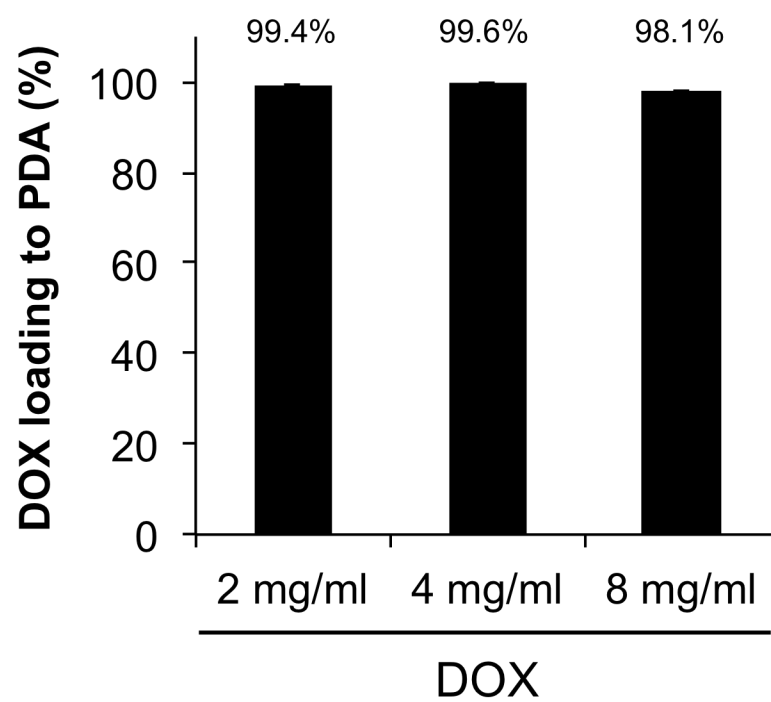

**Figure S1.** Efficiency of DOX loading to 10 wt% PDA determined by ultrafiltration and absorbance measurements of unconjugated DOX at 480 nm.

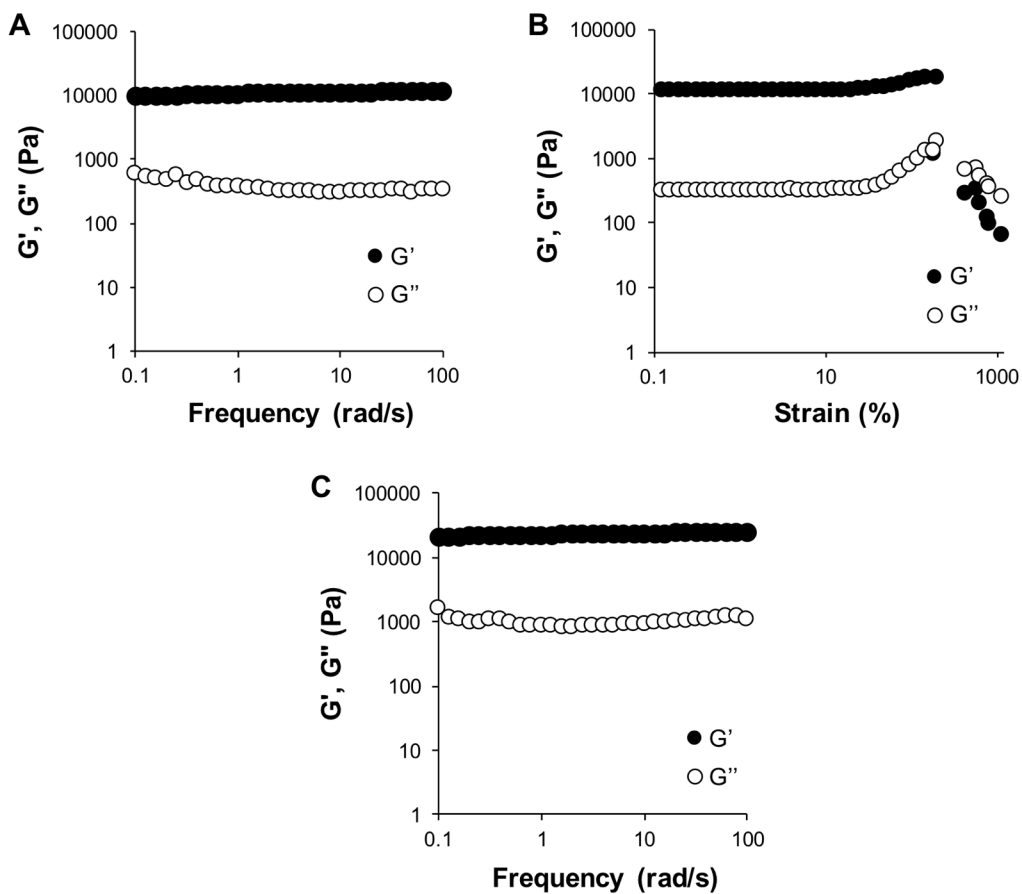

**Figure S2.** (A) Frequency sweep (0.1 – 100 rad/s at constant 0.2% strain, after gelation for 6 hours). (B) Strain sweep (0.1 – 1000% strain at constant frequency (6 rad/s), after gelation for 6 hours). (C) Frequency sweep (0.1 – 100 rad/s at constant 0.2% strain, after gelation for 24 hours).

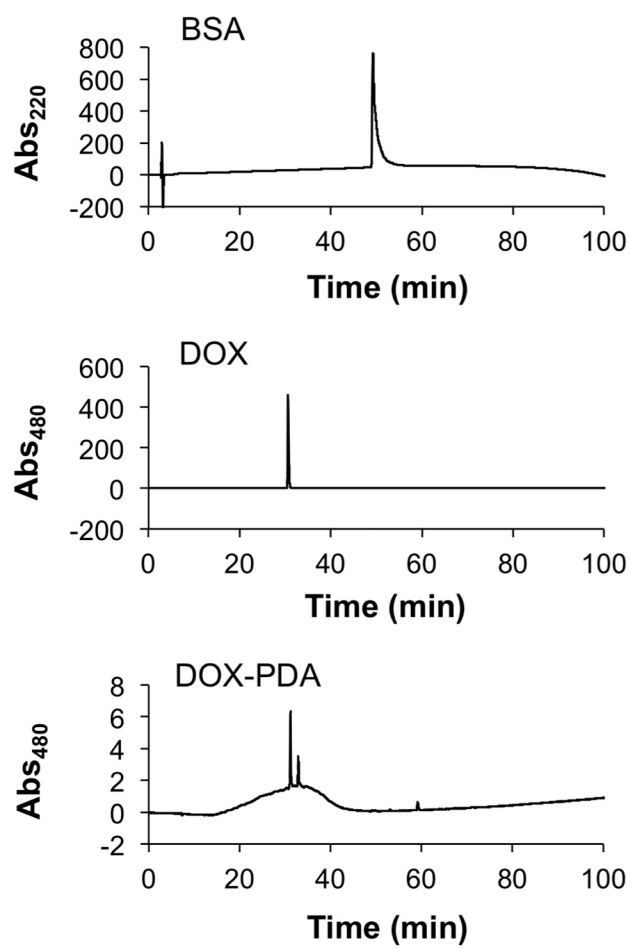

**Figure S3.** HPLC chromatograms of BSA (absorbance at 220 nm), DOX (480 nm), and DOX-PDA (480 nm).

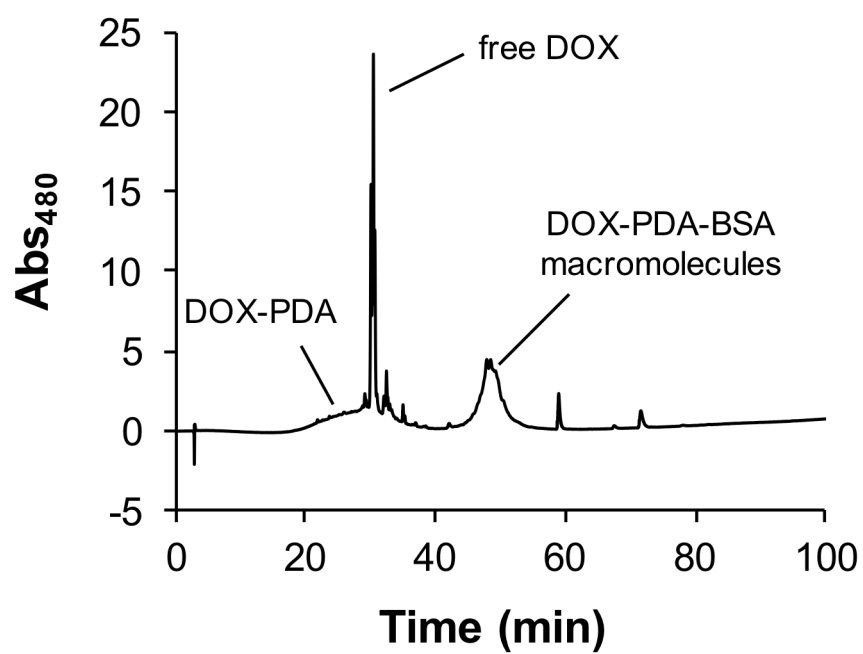

**Figure S4.** Hydrolytic degradation products of a DOX-PDA-BSA bioadhesive gel assessed by HPLC (absorbance at 480 nm) after 4 weeks.

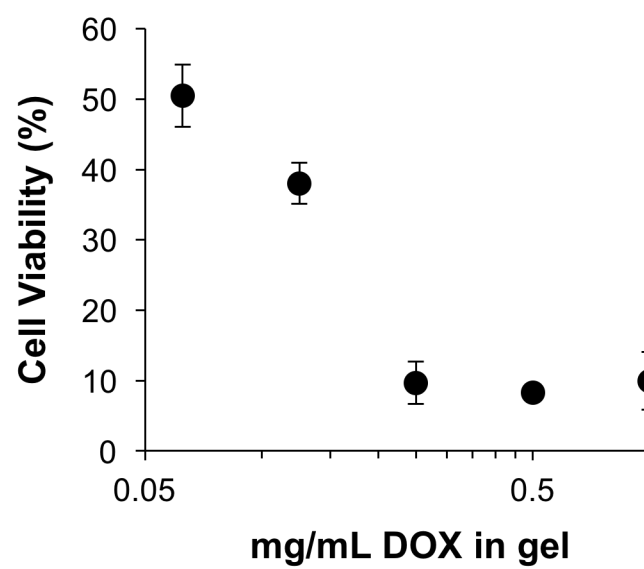

**Figure S5.** In vitro cytotoxicity of DOX-PDA-BSA bioadhesive gels for human dermal fibroblasts.

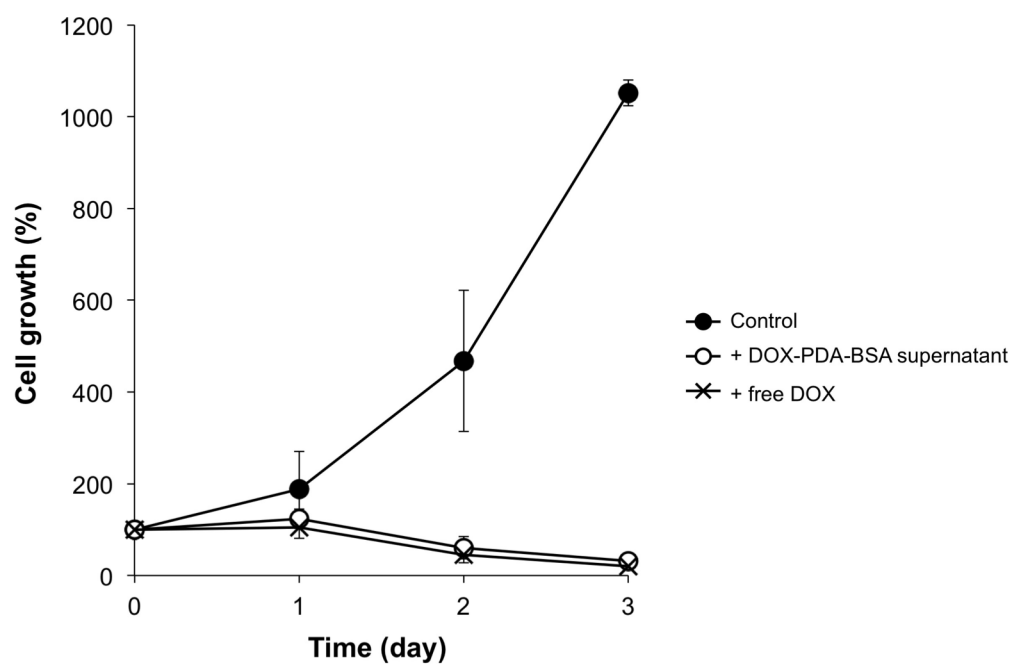

**Figure S6.** A549 cell viability measured by MTT assay for total DOX released to supernatant (4  $\mu\text{g/mL}$  total DOX) versus free DOX (4  $\mu\text{g/mL}$ ) as a function of time.
